# Supplementary material for: Effects of coarse woody debris with morphological complexity on organic matter retention and the aquatic biodiversity in a stream ecosystem
Source: Research Square preprint supplement (doi:10.21203/rs.3.rs-8761180/v1), 2026-02-24
Supplement: Supplementary file 1 [file 2dfad02cc57fd3291846c91d.docx]

Table 1 PCA result

Table 2 Abundance of benthic invertebrates

Table 3 Taxon and Feeding group of benthic invertebrates and organisms associated with litter directly retained by CWD
